# Supplementary material for: Antimicrobial Use in Pig Farms in the Midwestern Region of Minas Gerais, Brazil
Source: MDPI journal article supplement (doi:10.3390/antibiotics13050403), 2024-04-28
Supplement: s1 [file s1]

Table S1 - Matrix of Spearman's correlation between the studied variables.

|                            |       | SOWS   | SCORE   | ATM     | DRUG    | DAYS | PROD       |
|----------------------------|-------|--------|---------|---------|---------|------|------------|
| Biosecurity                | SCORE | 0.45 * |         |         |         |      |            |
| Quantity of antimicrobials | ATM   | 0.24   | 0.01    |         |         |      |            |
| No. of ATM                 | BASES | 0.48 * | 0.35 \$ | 0.49 *  |         |      |            |
| ATM exposure days          | DAYS  | -0.09  | 0.04    | 0.31 \$ | 0.37 \$ |      |            |
| Productivity               | PROD  | 0.29   | 0.50 *  | -0.10   | 0.23    | 0.14 |            |
| Daily Weight Gain          | DWG   | 0.07   | 0.30    | -0.11   | 0.15    | 0.16 | 0.63 *Note |

ATM- antimicrobial, \*  $p < 0.05$  and \$  $p < 0.10$

Obs.: Collinearity effect between Daily Weight Gain X Productivity.

Table S2 – Contribution (%) of the variables in each dimension by principal component.

|                           | Number of dimensions / Main components |        |        |        |         |
|---------------------------|----------------------------------------|--------|--------|--------|---------|
|                           | 1                                      | 2      | 3      | 4      | 5       |
| Eigenvalues               | 2,317                                  | 0.988  | 0.836  | 0.538  | 0.321   |
| Percentage of Variance, % | 46,344                                 | 19,758 | 16,714 | 10,754 | 6,430   |
| Accumulated variance, %   | 46,344                                 | 66.103 | 82,816 | 93,570 | 100,000 |
| Variables                 |                                        |        |        |        |         |
| SOWS                      | 19.57                                  | 4.35   | 34.24  | 38.30  | 3.53    |
| SCORE                     | 10.04                                  | 61.87  | 8.92   | 9.28   | 9.90    |
| ATM                       | 20.97                                  | 19.34  | 10.50  | 35.68  | 13.51   |
| DRUGS                     | 33.72                                  | 0.03   | 0.59   | 1.09   | 64.57   |
| DAYS                      | 15.70                                  | 14.41  | 45.75  | 15.65  | 8.48    |

Table S3 - Multiple linear regression models.

| RESULT                           | PREDICTOR | ESTIMATE  | STANDARD ERROR | P-VALUE |
|----------------------------------|-----------|-----------|----------------|---------|
| PRODUCTIVITY                     |           |           |                |         |
| Adjusted R <sup>2</sup> = 0.2994 | intercept | 1,951,388 | 252,732        | <0.001  |
| P = 0.001                        | SCORE     | 1.502     | 0.417          | 0.001   |
| DAILY WEIGHT GAIN                |           |           |                |         |
| Adjusted R <sup>2</sup> = 0.0884 | intercept | 0.625     | 0.024          | <0.001  |
| P = 0.065                        | SCORE     | 0.000077  | 0.000040       | 0.065   |
